# Supplementary material
Source: publisher figshare collection journal article supplement (https://acs.figshare.com/ndownloader/files/3791191)
Supplement: Supplementary file 1 [file 3791191]

## SUPPORTING INFORMATION

### Atomic Motion in the Complex Hydride $\text{Li}_3(\text{NH}_2)_2\text{I}$ : $^7\text{Li}$ and $^1\text{H}$ Nuclear Magnetic Resonance Studies

Alexander V. Skripov,<sup>\*,†</sup> Roman V. Skoryunov,<sup>†</sup> Alexei V. Soloninin,<sup>†</sup> Olga A. Babanova,<sup>†</sup>

Motoaki Matsuo,<sup>‡</sup> and Shin-ichi Orimo<sup>‡§</sup>

<sup>†</sup> Institute of Metal Physics, Ural Branch of the Russian Academy of Sciences, S. Kovalevskoi 18, Ekaterinburg 620137, Russia

<sup>‡</sup> Institute for Materials Research, Tohoku University, Sendai 980-8577, Japan

<sup>§</sup> WPI-Advanced Institute for Materials Research, Tohoku University, Sendai 980-8577, Japan

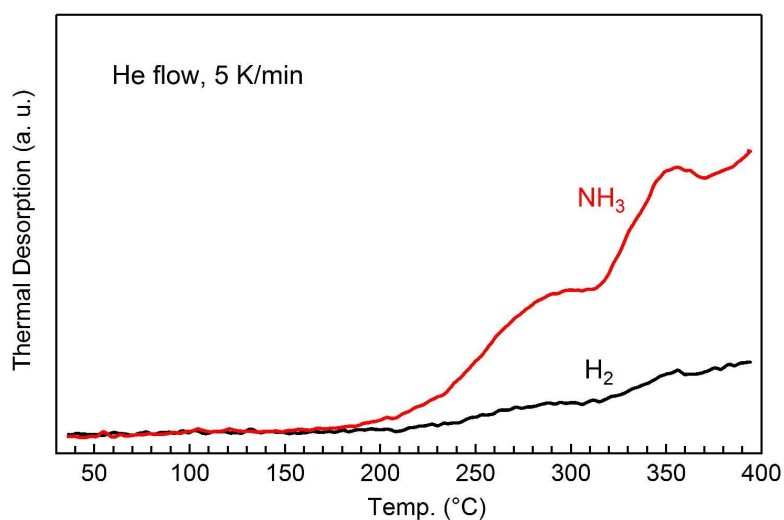

**Figure S1.** Thermal desorption profile of  $\text{Li}_3(\text{NH}_2)_2\text{I}$  measured by mass spectroscopy using Anelva M-QA200TS under helium flow of 150 ml/min at the heating rate of 5 K/min.

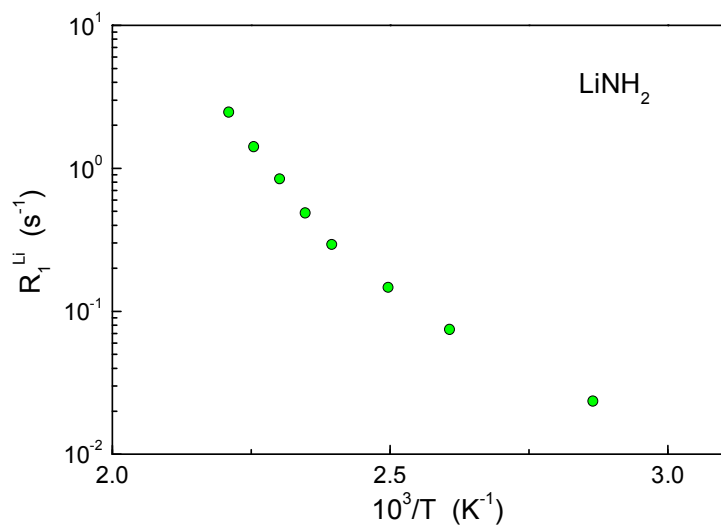

**Figure S2.**  $^7\text{Li}$  spin-lattice relaxation rate measured at 28 MHz for  $\text{LiNH}_2$  as a function of the inverse temperature.

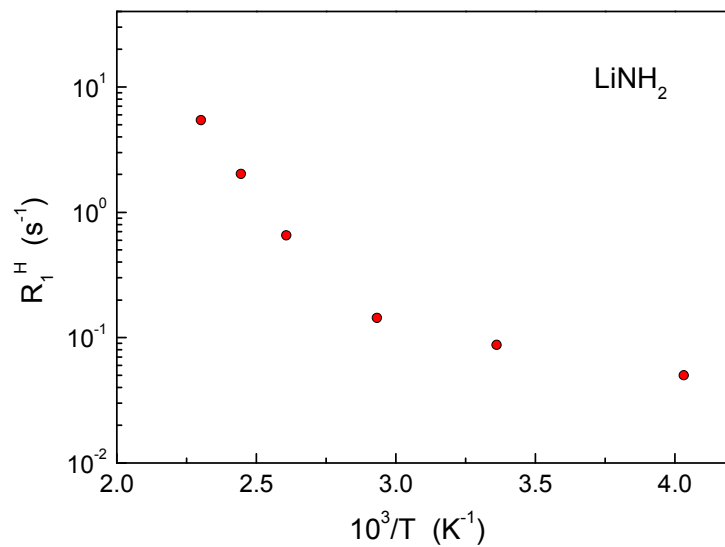

**Figure S3.** Proton spin-lattice relaxation rate measured at 28 MHz for  $\text{LiNH}_2$  as a function of the inverse temperature.

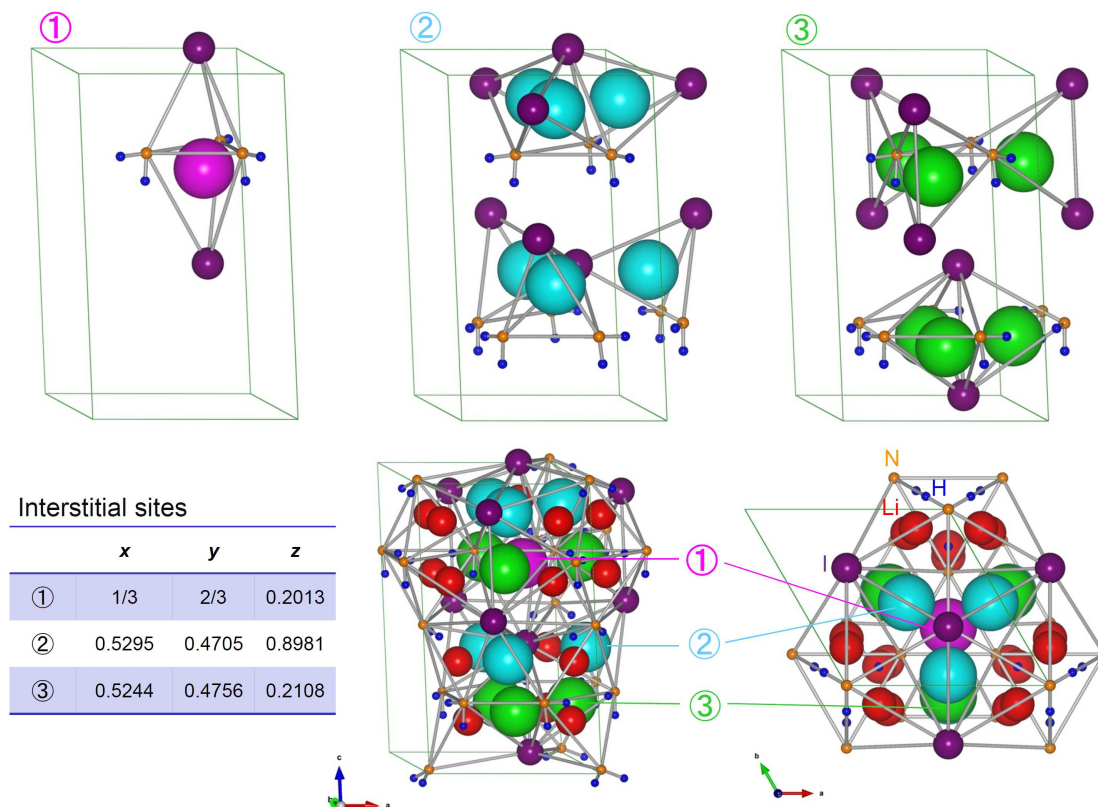

**Figure S4.** Top: local environment of three types (1, 2, and 3) of the largest interstitial sites in  $\text{Li}_3(\text{NH}_2)_2$ . Bottom: two projections of the structure with the interstitial sites included. The table shows the coordinates of these interstitial sites. The location of the interstitial sites was obtained using the program MedeA (Materials Design, Inc., version 2.4.7, <http://www.materialsdesign.com/medea> ).
